# Supplementary material for: In vivo confocal microscopic corneal images in health and disease with an emphasis on extracting features and visual signatures for corneal diseases: a review study
Source: HighWire-hosted journal article supplement (doi:10.1136/bjophthalmol-2015-306934), 2015-11-09
Supplement: bjophthalmol-2015-306934supp.pdf [file bjophthalmol-2015-306934supp.pdf]

## Appendix A

**Table 1:** The visual signatures of the reviewed epithelial and sub-epithelial diseases.

| Epithelial and sub-epithelial diseases |            |                                                                                                                                                                                                                                                                                                                                                                        |
|----------------------------------------|------------|------------------------------------------------------------------------------------------------------------------------------------------------------------------------------------------------------------------------------------------------------------------------------------------------------------------------------------------------------------------------|
| The disease                            |            | The visual signatures                                                                                                                                                                                                                                                                                                                                                  |
| Amiodarone-induced keratopathy         |            | – In the basal epithelial cells, white and adjacent inclusions appear that are small and have rounded-shape structures <sup>24</sup> .                                                                                                                                                                                                                                 |
| Advancing epitheliopathy               | wave-like  | – Vertically stretched epithelial cells that have needle-shape and surrounded by a grey hazy halo with high intensity nuclei <sup>25</sup> .                                                                                                                                                                                                                           |
| Epithelial membrane dystrophy          | basement   | – Large area of light grey colour reflection can be seen with highly reflective nuclei that appear as white circles that have grey double-walled aureole <sup>26</sup> .<br>– Many elliptic cysts with poorly defined borders <sup>26</sup> .<br>– High reflective linear structure that has well-delineated anterior border <sup>26</sup> .                           |
| Salzmann's degeneration                | nodular    | – Highly reflective adjacent irregular and polygonal shaped basal epithelial cells appear with highly reflective nuclei that appear in each polygonal cell as a small grey dot <sup>28</sup> .<br>– A nerve fibre appears as undulating sloping line with high intensity. Small bright dots appear on and beside the lower side of the nerve fibre <sup>27, 28</sup> . |
| Gelatinous dystrophy                   | drop-like  | – Hyper-reflective and adjacent polygonal epithelial cells with irregular structure <sup>29</sup> .<br>– Beneath the epithelium, amyloid materials appear as highly reflective accumulations spread in irregular ways <sup>29</sup> .                                                                                                                                  |
| Thygeson keratitis                     | epithelial | – Highly reflective deposits with cotton-like appearance in the basal epithelial <sup>30</sup> .<br>– Epithelial cells that look like cracked ground. These cells are disconnected and appear as high intensity curvy lines on a low intensity background. Small numbers of highly reflective spots also appear <sup>30, 31</sup> .                                    |
| Meesmann's dystrophy                   |            | – Well-delineated rounded shapes lesions surrounded by reflective points in the cytoplasm <sup>26</sup> .                                                                                                                                                                                                                                                              |

|                                |           |                                                                                                                                                                                                                                                                                                                                                                                                      |
|--------------------------------|-----------|------------------------------------------------------------------------------------------------------------------------------------------------------------------------------------------------------------------------------------------------------------------------------------------------------------------------------------------------------------------------------------------------------|
|                                |           | <ul style="list-style-type: none"> <li>– Multiple cyst-like changes which are very similar in size and distributed non-uniformly at the level of the basal epithelium with white colour while the normal cells have very dark grey colour with unclear borders<sup>8</sup>.</li> </ul>                                                                                                               |
| Recurrent Syndrome             | Erosion   | <ul style="list-style-type: none"> <li>– A large area of high reflection with two bright white slanted lines over the epithelial mosaic<sup>26</sup>.</li> </ul>                                                                                                                                                                                                                                     |
| Acanthamoeba keratitis         | infective | <ul style="list-style-type: none"> <li>– Highly reflective elliptic cysts within the corneal epithelium. These cysts could be single-walled structures that are very clear and varying in size, or could be double-walled structures with low intensity and thick border<sup>1, 8, 16, 34, 35</sup>.</li> </ul>                                                                                      |
| Bacterial keratitis            |           | <ul style="list-style-type: none"> <li>– Crowded hyper-reflective dendritic-like cells appear at stroma depths and the background can hardly be seen<sup>8, 36</sup>.</li> <li>– Thin, and short filamentous structures (Nocardia) that demonstrated right-angled branching surrounding by round to oval bright inflammatory cell<sup>38</sup>.</li> </ul>                                           |
| Viral keratitis: simplex virus | herpes    | <ul style="list-style-type: none"> <li>– Increase in cell size and hyperreflectivity while there is a decrease in cell density in the Superficial epithelium layer<sup>39</sup>.</li> <li>– Pseudoguttata possess a line of high reflection on the border of the elevated dark area, and intercellular gaps appear as small black dots at the vertices of endothelial cells<sup>40</sup>.</li> </ul> |

**Table 2:** The visual signatures of the reviewed Bowman layer diseases.

| <b>Bowman layer diseases</b> |                                                                                                                                                                                                                                                                                                                                                                                                                                                              |
|------------------------------|--------------------------------------------------------------------------------------------------------------------------------------------------------------------------------------------------------------------------------------------------------------------------------------------------------------------------------------------------------------------------------------------------------------------------------------------------------------|
| <b>The disease</b>           | <b>The Visual signatures</b>                                                                                                                                                                                                                                                                                                                                                                                                                                 |
| Reis-Bückler's dystrophy     | <ul style="list-style-type: none"> <li>– A high intensity elongated area with grey boundary that is interspersed with the basal epithelial cells<sup>42</sup>.</li> <li>– High reflective small granular materials replaces Bowman's layer. These granular materials group together as one big white area<sup>43</sup>.</li> </ul>                                                                                                                           |
| Thiel-Behnke dystrophy       | <ul style="list-style-type: none"> <li>– Deposits which appear hazy with different intensity values and cover a wide area of the basal epithelium. The edges of these hazy deposits have very low intensity undulating structure<sup>8, 43</sup>.</li> <li>– The Bowman's layer is completely hidden by reflective materials that appear as haze with different values of intensity and with some diffuse bright irregular spots<sup>8, 43</sup>.</li> </ul> |

**Table 3:** The visual signatures of the reviewed stromal diseases.

| <b>Stromal diseases</b>                       |                                                                                                                                                                                                                                                                                                                                                                                                                                                                                                                                  |
|-----------------------------------------------|----------------------------------------------------------------------------------------------------------------------------------------------------------------------------------------------------------------------------------------------------------------------------------------------------------------------------------------------------------------------------------------------------------------------------------------------------------------------------------------------------------------------------------|
| <b>The disease</b>                            | <b>The visual signatures</b>                                                                                                                                                                                                                                                                                                                                                                                                                                                                                                     |
| Lattice dystrophy                             | <p>– In the mid-stroma, small numbers of undulating and thin string-like structures of different lengths and high intensities interacting with the keratocytes which appear as hyper-reflective irregular shapes<sup>44, 45</sup>.</p> <p>– In the anterior and middle stroma, big bright tubular structure with well-defined edges interspersed with normal bright keratocytes. Keratocytes have irregular structures of different sizes<sup>42</sup>.</p>                                                                      |
| Fleck dystrophy                               | <p>– High intensity irregular large spots enclosed in a cyst-like structure throughout the stroma. A high intensity spherical area, relatively large, is connected with the cyst-like structure<sup>8, 15, 47</sup>.</p>                                                                                                                                                                                                                                                                                                         |
| Granular dystrophy                            | <p>– High reflective irregular deposits varying in size appeared in the anterior stroma with high intensity curved line<sup>42</sup>.</p> <p>– In the deep stroma, a large number of high intensity small deposits of punctiform structures are dispersed between high reflective rounded and oval shape keratocytes nuclei<sup>42</sup>.</p>                                                                                                                                                                                    |
| Schnyder crystalline corneal dystrophy (SCCD) | <p>– High reflective and small elliptic material accumulated inside and around anterior keratocytes which have hypo-reflective irregular structures<sup>50</sup>.</p> <p>– In the anterior stroma, high intensity and well-delineated needle-shaped adjacent deposits largely bundled together<sup>51</sup>.</p> <p>– In the anterior stroma, some abnormal nerve branches can also be found. The nerve branches appear intersecting in the middle of the reflection area and have an irregularly curved shape<sup>52</sup>.</p> |
| Avellino corneal dystrophy                    | <p>– At the level of the superficial and middle stroma, a high reflective cloud of granular materials appears that has irregular curvy borders with low intensity<sup>48</sup>.</p>                                                                                                                                                                                                                                                                                                                                              |
| Macular corneal dystrophy                     | <p>– High reflective accumulation of granules in the superficial stroma<sup>43</sup>.</p>                                                                                                                                                                                                                                                                                                                                                                                                                                        |

|                                           |                                                                                                                                                                                                                                                                                                                                                                                                                                                                                                                                                                                                                                                                                              |
|-------------------------------------------|----------------------------------------------------------------------------------------------------------------------------------------------------------------------------------------------------------------------------------------------------------------------------------------------------------------------------------------------------------------------------------------------------------------------------------------------------------------------------------------------------------------------------------------------------------------------------------------------------------------------------------------------------------------------------------------------|
|                                           | <ul style="list-style-type: none"> <li>– In mid-stroma, multiple hypo-reflective materials that have striae-like shapes appear. These linear shapes slope vertically and are thick<sup>48</sup>.</li> </ul>                                                                                                                                                                                                                                                                                                                                                                                                                                                                                  |
| Central Cloudy Dystrophy of François      | <ul style="list-style-type: none"> <li>– In the superficial stromal layer high reflective granules with irregular size groupings<sup>54</sup>.</li> <li>– Deep stroma appears as a hazy hyper-reflective background with many intersecting, low intensity, and thick lines<sup>54</sup>.</li> </ul>                                                                                                                                                                                                                                                                                                                                                                                          |
| Pre-Descemet's membrane corneal dystrophy | <ul style="list-style-type: none"> <li>– Very small highly reflective dots interacting with normal keratocyte nuclei of anterior stroma<sup>55</sup>.</li> <li>– Posterior stroma shows hyper-reflective vesicles with irregular shapes containing bright granules<sup>55</sup>.</li> </ul>                                                                                                                                                                                                                                                                                                                                                                                                  |
| Posterior amorphous corneal dystrophy     | <ul style="list-style-type: none"> <li>– Hyper-reflective sheet-like area which has spikes with medium intensity from the right side of it appearing in the posterior stroma<sup>56</sup>.</li> </ul>                                                                                                                                                                                                                                                                                                                                                                                                                                                                                        |
| Corneal amyloidosis                       | <ul style="list-style-type: none"> <li>– Cotton candy-like reflection and fibrillar amyloid material that appears in the anterior stroma. This material has very uniform grey values<sup>15, 57</sup>.</li> </ul>                                                                                                                                                                                                                                                                                                                                                                                                                                                                            |
| Fungal keratitis                          | <ul style="list-style-type: none"> <li>– <i>Fusarium solani</i> reveals highly reflective hyphae of length (200-300) <math>\mu\text{m}</math> and of width (3-5) <math>\mu\text{m}</math> with branches at 90° angles in the anterior stroma and Round inflammatory cells are present<sup>1, 58</sup>.</li> <li>– <i>Aspergillus</i> hyphae have the same characteristics of <i>Fusarium solani</i> hyphae with branches at 45° angles<sup>1, 58</sup>.</li> <li>– <i>Candida</i> pseudophilaments reveals high reflective elongated particles measure 10–40 <math>\mu\text{m}</math> in length and 5–10 <math>\mu\text{m}</math> located in the anterior stroma<sup>1, 58</sup>.</li> </ul> |

**Table 4:** The visual signatures of the reviewed Descemet's membrane and Endothelial diseases.

| <b>Descemet's membrane and Endothelial diseases</b> |                                                                                                                                                                                                                               |
|-----------------------------------------------------|-------------------------------------------------------------------------------------------------------------------------------------------------------------------------------------------------------------------------------|
| <b>The disease</b>                                  | <b>The visual signatures</b>                                                                                                                                                                                                  |
| Fuchs' endothelial dystrophy (Cornea guttata)       | – Many roundish low intensity areas of different sizes with central light spots between the hyper-reflective endothelial cells which appear clearly <sup>8, 15, 59, 60</sup> .                                                |
| Iridocorneal endothelial syndrome (ICE syndrome)    | – Endothelium appears as epithelium-like transformation with bright nuclei that appear as high intensity elliptic structures surrounded by unclear and irregular cell borders that have very low intensity <sup>8, 61</sup> . |
| Posterior polymorphous corneal dystrophy (PPCD)     | – Well-delineated roundish shape or elliptical endothelial lesions with low intensities near to black and appear in curvilinear pattern <sup>8, 63</sup> .                                                                    |
| Brown-McLean syndrome                               | – A highly reflective pigmentation intersperses endothelium cells which consists of an accumulation of bright round bodies with clear borders <sup>64</sup> .                                                                 |

## Appendix B

**Table 5:** Shape-based features extracted from the visual signatures of the reviewed corneal diseases.

| Shape                                       | Disease                                                                                                                                                                                                                                                                                                                                                                                                                                                                                                                                                                                                                                                   |
|---------------------------------------------|-----------------------------------------------------------------------------------------------------------------------------------------------------------------------------------------------------------------------------------------------------------------------------------------------------------------------------------------------------------------------------------------------------------------------------------------------------------------------------------------------------------------------------------------------------------------------------------------------------------------------------------------------------------|
| Rounded<br>(circle, ellipse, circular line) | <b>Epithelial and sub-epithelial:</b> <ul style="list-style-type: none"> <li>• Amiodarone-induced keratopathy</li> <li>• Epithelial basement membrane dystrophy</li> <li>• Meesmann's dystrophy</li> <li>• Acanthamoeba infective keratitis</li> <li>• Viral keratitis: herpes simplex virus</li> </ul> <b>Stromal:</b> <ul style="list-style-type: none"> <li>• Fleck dystrophy</li> </ul> <b>Descemet's membrane and Endothelial:</b> <ul style="list-style-type: none"> <li>• Fuchs' endothelial dystrophy</li> <li>• Posterior polymorphous corneal dystrophy</li> </ul>                                                                              |
|                                             | <b>Epithelial and sub-epithelial:</b> <ul style="list-style-type: none"> <li>• Advancing wave-like epitheliopathy</li> <li>• Epithelial basement membrane dystrophy</li> <li>• Salzmann's nodular degeneration</li> <li>• Recurrent Erosion Syndrome</li> <li>• Bacterial keratitis</li> </ul> <b>Bowman layer:</b> <ul style="list-style-type: none"> <li>• Reis-Bückler's dystrophy</li> </ul> <b>Stromal:</b> <ul style="list-style-type: none"> <li>• Lattice dystrophy</li> <li>• Schnyder crystalline corneal dystrophy</li> <li>• Macular corneal dystrophy</li> <li>• Central Cloudy Dystrophy of François</li> <li>• Fungal keratitis</li> </ul> |
|                                             | <b>Bowman layer:</b> <ul style="list-style-type: none"> <li>• Reis-Bückler's dystrophy</li> </ul> <b>Stromal:</b> <ul style="list-style-type: none"> <li>• Fleck dystrophy</li> <li>• Granular dystrophy</li> <li>• Avellino corneal dystrophy</li> <li>• Schnyder crystalline corneal dystrophy</li> <li>• Macular corneal dystrophy</li> </ul>                                                                                                                                                                                                                                                                                                          |
| Punctiform<br>(granular)                    | <b>Bowman layer:</b> <ul style="list-style-type: none"> <li>• Reis-Bückler's dystrophy</li> </ul> <b>Stromal:</b> <ul style="list-style-type: none"> <li>• Fleck dystrophy</li> <li>• Granular dystrophy</li> <li>• Avellino corneal dystrophy</li> <li>• Schnyder crystalline corneal dystrophy</li> <li>• Macular corneal dystrophy</li> </ul>                                                                                                                                                                                                                                                                                                          |

|                                                                           |                                                                                                                                                                                                                                                                                                                                                                                                                                                                                                                                                                                                                         |
|---------------------------------------------------------------------------|-------------------------------------------------------------------------------------------------------------------------------------------------------------------------------------------------------------------------------------------------------------------------------------------------------------------------------------------------------------------------------------------------------------------------------------------------------------------------------------------------------------------------------------------------------------------------------------------------------------------------|
|                                                                           | <ul style="list-style-type: none"> <li>• Central Cloudy Dystrophy of François</li> <li>• Pre-Descemet's membrane corneal dystrophy</li> </ul>                                                                                                                                                                                                                                                                                                                                                                                                                                                                           |
| Cotton<br>(deposits with irregular shape, sheet-like, haze, pigmentation) | <p><b>Epithelial and sub-epithelial:</b></p> <ul style="list-style-type: none"> <li>• Thygeson epithelial keratitis</li> <li>• Bacterial keratitis</li> </ul> <p><b>Bowman layer:</b></p> <ul style="list-style-type: none"> <li>• Thiel-Behnke dystrophy</li> </ul> <p><b>Stromal:</b></p> <ul style="list-style-type: none"> <li>• Granular dystrophy</li> <li>• Posterior amorphous corneal dystrophy</li> <li>• Corneal amyloidosis</li> </ul> <p><b>Descemet's membrane and Endothelial:</b></p> <ul style="list-style-type: none"> <li>• Fuchs' endothelial dystrophy</li> <li>• Brown-McLean syndrome</li> </ul> |
| Irregular polygonal                                                       | <p><b>Epithelial and sub-epithelial:</b></p> <ul style="list-style-type: none"> <li>• Salzmann's nodular degeneration</li> <li>• Gelatinous drop-like dystrophy</li> </ul> <p><b>Descemet's membrane and Endothelial:</b></p> <ul style="list-style-type: none"> <li>• Iridocorneal endothelial syndrome</li> </ul>                                                                                                                                                                                                                                                                                                     |
